# Supplementary material
Source: PubMed Central journal article supplement (PMC7288583)
Supplement: ao0c01136_si_001.pdf [file ao0c01136_si_001.pdf]

## Supplementary data

### Green synthesized Ag nanoparticles for bio-sensing and photocatalytic applications

**Kevin Varghese Alex<sup>a</sup>, Parthiban Tamil Pava<sup>a</sup>, Radhasaran Rugmini<sup>a</sup>, Madavi Shiva Prasad<sup>b</sup>, Koppole Kamakshi<sup>c,\*</sup>, Koppole Chandra Sekhar<sup>a,\*</sup>**

<sup>a</sup>Department of Physics, School of Basic and Applied Sciences, Central University of Tamil Nadu, Thiruvarur 610 005, India

<sup>b</sup>Department of Chemistry, School of Basic and Applied Sciences, Central University of Tamil Nadu, Thiruvarur 610 005, India

<sup>c</sup>Department of Science and Humanities, Indian Institute of Information Technology Tiruchirappalli, Tiruchirappalli 620 015, Tamil Nadu, India

\*Corresponding author's e-mail: [sekhar.koppole@gmail.com](mailto:sekhar.koppole@gmail.com)  
: [kamakshik@iiitt.ac.in](mailto:kamakshik@iiitt.ac.in)

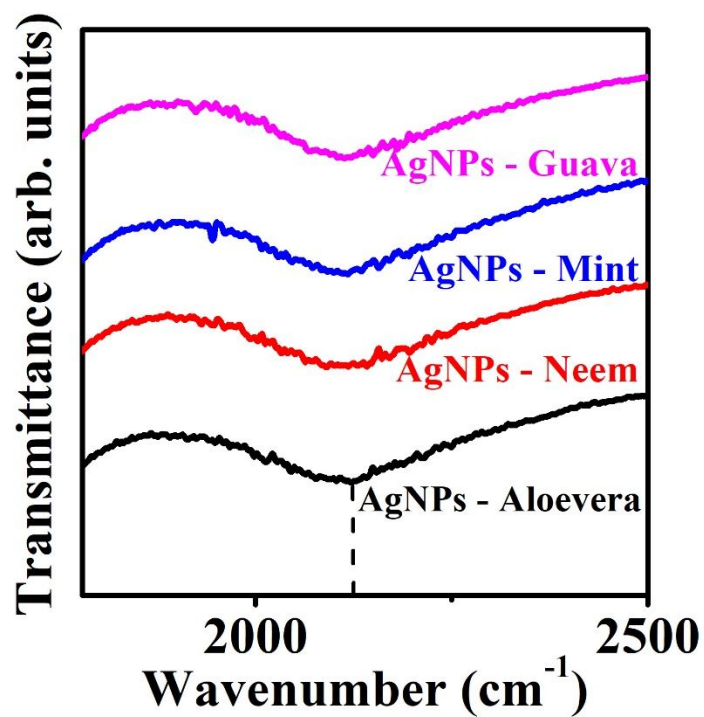

**Figure S1.** Enlarged view of the FTIR peak at 2110 cm<sup>-1</sup> of Ag NPs prepared using different leaf extracts.

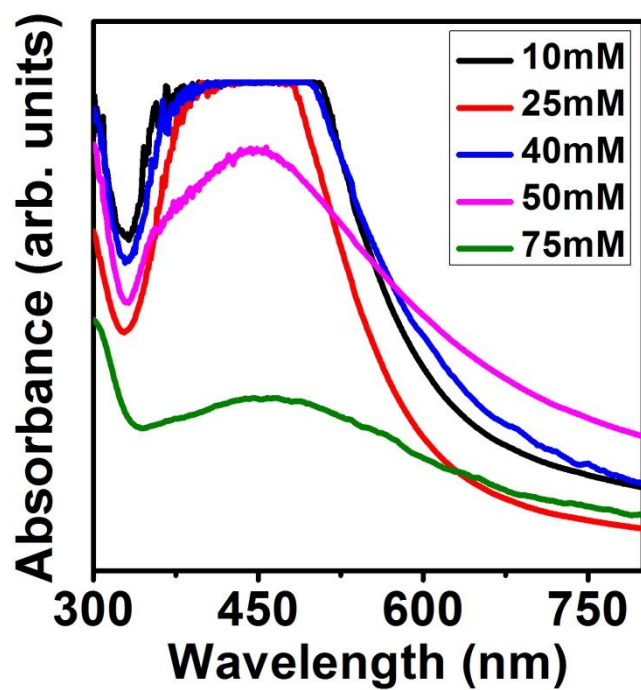

**Figure S2.** Absorbance spectra of Ag NPs prepared using different AgNO<sub>3</sub> concentration.

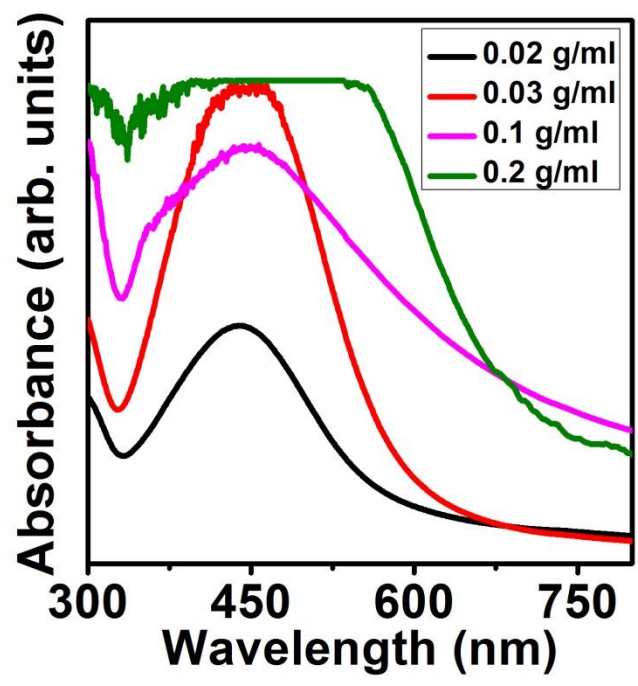

**Figure S3.** Absorbance spectra of Ag NPs prepared using different leaf extract concentration

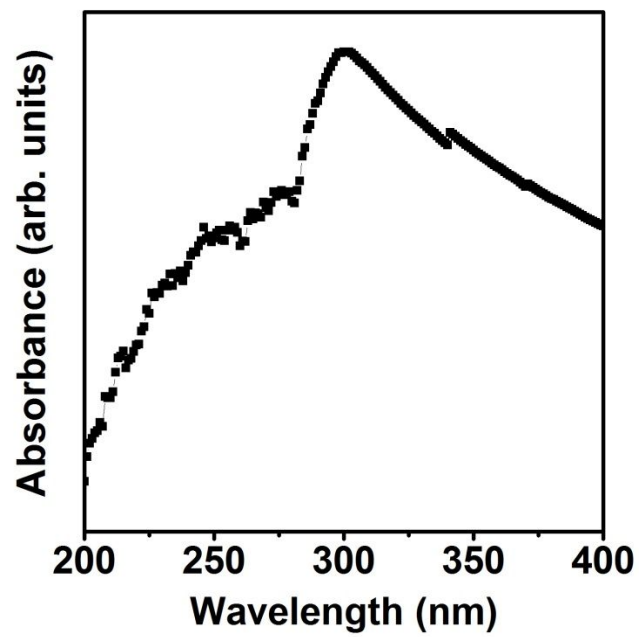

**Figure S4.** Absorbance spectra of 0.5 mM mancozeb solution coated on glass substrate.

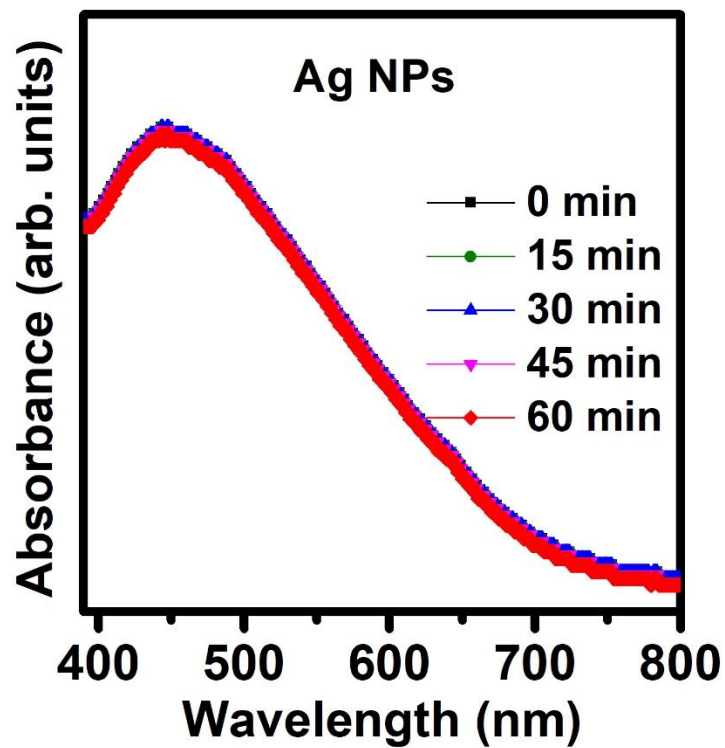

**Figure S5.** Absorbance spectra of pure Ag NPs for different times under UV – visible illumination.

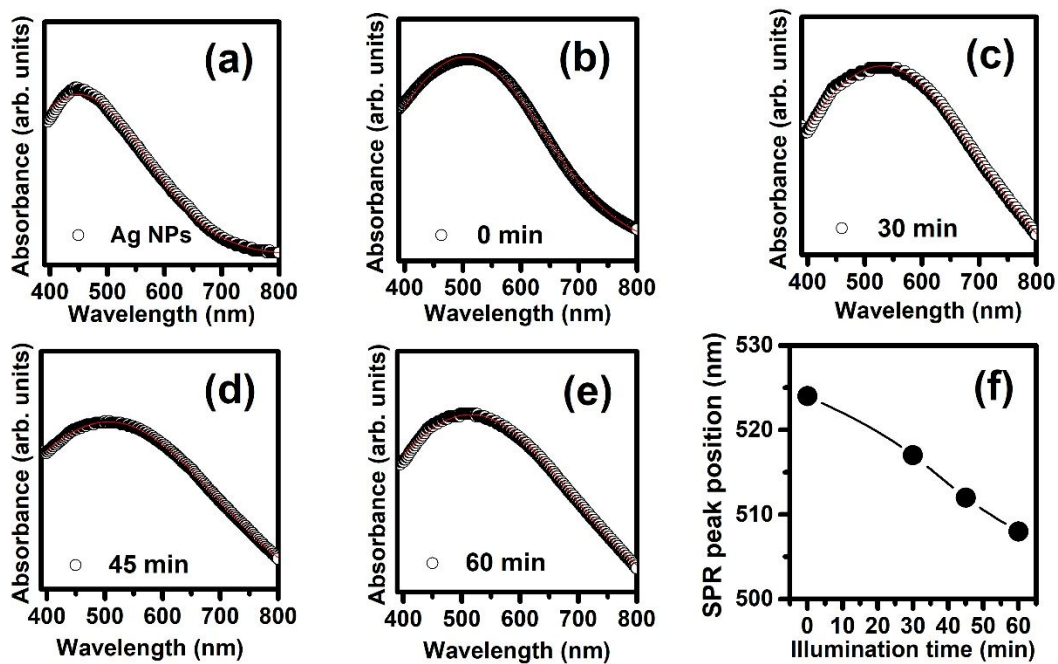

**Figure S6.** (a) Absorbance spectrum of pure Ag NPs and (b) – (f) Absorbance spectra of mancozeb coated Ag NPs at different illumination times.

## GCMS Analysis

**Table S1. Neem leaf extract**

| Peak # | R.Time | Area   | Area % | Height | Height % | Name                                                         | Base m/z |
|--------|--------|--------|--------|--------|----------|--------------------------------------------------------------|----------|
| 1      | 11.559 | 4831   | 0.66   | 4079   | 1.97     | .ALPHA.-CYCLOGERANIOL                                        | 121.15   |
| 2      | 11.917 | 36055  | 4.90   | 7785   | 3.76     | NEOPENTYL FORMATE                                            | 57.05    |
| 3      | 11.992 | 21275  | 2.89   | 5454   | 2.63     | CARATHANE                                                    | 69.05    |
| 4      | 12.476 | 5357   | 0.73   | 3697   | 1.79     | 2-TERT-BUTYL-4-(1,1,3,3-TETRAMETHYLBUTYL)PHENOL              | 191.15   |
| 5      | 12.803 | 4002   | 0.54   | 3150   | 1.52     | 5-Ethoxycarbonyl-4-methyloxazole                             | 127.05   |
| 6      | 13.273 | 15874  | 2.16   | 14812  | 7.15     | (+)-.BETA.-COSTAL                                            | 121.10   |
| 7      | 16.425 | 51501  | 7.00   | 26888  | 12.99    | (-)-CIS-PINAN                                                | 68.05    |
| 8      | 21.971 | 328707 | 44.65  | 85170  | 41.13    | 3,7,11,15-Tetramethyl-2-hexadecen-1-ol                       | 71.05    |
| 9      | 35.931 | 35589  | 4.83   | 11975  | 5.78     | 1-(2-HYDROXYETHOXY)TRIDECANE                                 | 57.05    |
| 10     | 39.189 | 76386  | 10.38  | 18446  | 8.91     | 1-BROMO-8-METHYLHEXACOSANE                                   | 57.10    |
| 11     | 42.283 | 23922  | 3.25   | 5297   | 2.56     | ELEPHANTOPIN                                                 | 69.10    |
| 12     | 43.874 | 30810  | 4.18   | 6438   | 3.11     | 3-FURYL METHYL CHLORIDE                                      | 69.05    |
| 13     | 44.417 | 20744  | 2.82   | 3074   | 1.48     | ETHANONE, 2-(4-CHLOROPHENYL)-1-CYCLOHEXYL-2-(1-PIPERIDINYL)- | 208.05   |
| 14     | 49.166 | 23200  | 3.15   | 3392   | 1.64     | 2-CYCLOPENTEN-1-ONE, 3-(3-HYDROXY-1-OCTENYL)-, [S-(E)]-      | 208.00   |
| 15     | 49.317 | 17851  | 2.42   | 1060   | 0.51     | BENZOFLEX                                                    | 207.00   |
| 16     | 49.500 | 17229  | 2.34   | 2738   | 1.32     | PENTANENITRILE, 3-(HYDROXYMETHYL)-                           | 55.00    |
| 17     | 49.676 | 22899  | 3.11   | 3603   | 1.74     | 6-[(2-OXOCYCLOHEXYL)METHYL]-4-OXA-5-AZASPIRO[2.4]HEPT-5-ENE  | 55.05    |
|        |        |        | 100.00 |        | 100.00   |                                                              |          |



**Table S2. Aloe vera leaf extract**

| Peak# | R.Time | Area   | Area%  | Height | Height% | Name                                                         | Base m/z |
|-------|--------|--------|--------|--------|---------|--------------------------------------------------------------|----------|
| 1     | 8.166  | 40932  | 2.96   | 9659   | 1.81    | ALPHA.-DECENE                                                | 55.05    |
| 2     | 10.991 | 145145 | 10.50  | 50059  | 9.39    | .alpha.-Tridecene                                            | 55.05    |
| 3     | 11.092 | 49951  | 3.61   | 6960   | 1.31    | (S)-4-IODO-1,2-EPOXYBUTANE                                   | 57.05    |
| 4     | 11.736 | 35893  | 2.60   | 11431  | 2.14    | Alanine, N-methyl-n-butoxycarbonyl-, hexadecyl ester         | 158.05   |
| 5     | 11.817 | 15358  | 1.11   | 6381   | 1.20    | PENTADECANE                                                  | 57.05    |
| 6     | 11.867 | 14173  | 1.02   | 6930   | 1.30    | 3-HYDROXY-4,4-DIMETHYLDIHYDRO(2-13C)FURAN-2-ONE              | 71.05    |
| 7     | 11.901 | 19300  | 1.40   | 9901   | 1.86    | But-3-en-1-yl 2-methylbutanoate                              | 57.05    |
| 8     | 12.167 | 14134  | 1.02   | 7205   | 1.35    | OCTANE                                                       | 71.05    |
| 9     | 12.227 | 43320  | 3.13   | 23803  | 4.47    | HEXANE, 3,3-DIMETHYL-                                        | 71.05    |
| 10    | 12.308 | 20327  | 1.47   | 3504   | 0.66    | OCTANE                                                       | 71.10    |
| 11    | 12.484 | 107959 | 7.81   | 67043  | 12.58   | 2,4-DITERT-BUTYLPHENOL                                       | 191.10   |
| 12    | 12.801 | 24407  | 1.77   | 9697   | 1.82    | NONANE, 1-IODO-                                              | 127.10   |
| 13    | 13.511 | 119993 | 8.68   | 66951  | 12.56   | 1-HEXADECENE                                                 | 55.05    |
| 14    | 13.608 | 20023  | 1.45   | 9473   | 1.78    | OCTADECYL FLUORIDE                                           | 57.05    |
| 15    | 13.674 | 26672  | 1.93   | 5356   | 1.00    | 2-DECYLOXYETHANOL                                            | 71.00    |
| 16    | 14.685 | 14876  | 1.08   | 9725   | 1.82    | 1-(2-HYDROXYETHOXY)TRIDECANE                                 | 85.10    |
| 17    | 14.747 | 45712  | 3.31   | 27817  | 5.22    | HEXANE, 3,3-DIMETHYL-                                        | 57.05    |
| 18    | 15.240 | 16281  | 1.18   | 8482   | 1.59    | 2-DECYLOXYETHANOL                                            | 71.10    |
| 19    | 15.846 | 61768  | 4.47   | 31009  | 5.82    | 1-HEPTADECENE                                                | 55.05    |
| 20    | 16.426 | 99485  | 7.19   | 45801  | 8.59    | NEOPHYTADIENE                                                | 57.05    |
| 21    | 17.075 | 17897  | 1.29   | 10600  | 1.99    | (E)-PHYTOL                                                   | 71.05    |
| 22    | 17.583 | 22000  | 1.59   | 8161   | 1.53    | 1-(2-HYDROXYETHOXY)TRIDECANE                                 | 85.10    |
| 23    | 19.225 | 51415  | 3.72   | 16332  | 3.06    | METHYL 4,6,10,14-TETRAMETHYLPENTADECANOATE                   | 57.05    |
| 24    | 21.977 | 95443  | 6.90   | 26358  | 4.94    | (R)-(-)-MENTHOL                                              | 57.10    |
| 25    | 39.198 | 36173  | 2.62   | 9896   | 1.86    | DOCOSANE                                                     | 57.05    |
| 26    | 40.058 | 17752  | 1.28   | 2913   | 0.55    | 6-[(2-OXOCYCLOHEXYL)METHYL]-4-OXA-5-AZASPIRO[2.4]HEPT-5-ENE  | 55.05    |
| 27    | 43.866 | 58849  | 4.26   | 13559  | 2.54    | GERANYL LINALOOL ISOMER B                                    | 81.05    |
| 28    | 46.303 | 124760 | 9.02   | 23698  | 4.45    | (-)-GLOBULOL                                                 | 95.15    |
| 29    | 50.258 | 22768  | 1.65   | 4395   | 0.82    | ETHANONE, 2-(4-CHLOROPHENYL)-1-CYCLOHEXYL-2-(1-PIPERIDINYL)- | 208.00   |
|       |        |        | 100.00 |        | 100.00  |                                                              |          |

**Table S3. Mint leaf extract**

| Peak# | R.Time | Area    | Area%  | Height | Height% | Name                                        | Base m/z |
|-------|--------|---------|--------|--------|---------|---------------------------------------------|----------|
| 1     | 8.159  | 92074   | 1.22   | 12674  | 0.60    | ALPHA-DECENE                                | 56.05    |
| 2     | 9.782  | 4179649 | 55.28  | 684296 | 32.29   | 2-P-CYMENOL                                 | 135.10   |
| 3     | 10.995 | 151054  | 2.00   | 49185  | 2.32    | 1-TETRADECANOL                              | 55.05    |
| 4     | 11.507 | 830506  | 10.98  | 366988 | 17.32   | (-).BETA.-CARYOPHYLLENE                     | 93.10    |
| 5     | 11.607 | 298797  | 3.95   | 148618 | 7.01    | .alpha.-Bergamotene                         | 93.10    |
| 6     | 11.742 | 50344   | 0.67   | 12892  | 0.61    | 1H-INDOLE-3-BUTANOIC ACID,<br>1,2-DIMETHYL- | 158.10   |
| 7     | 11.974 | 185966  | 2.46   | 94715  | 4.47    | ALPHA-CARYOPHYLLENE                         | 93.05    |
| 8     | 12.227 | 45840   | 0.61   | 26104  | 1.23    | HEXANE, 3,3-DIMETHYL-                       | 71.10    |
| 9     | 12.486 | 143099  | 1.89   | 84902  | 4.01    | 2,4-DI-T-BUTYLPHENOL                        | 191.15   |
| 10    | 13.515 | 110933  | 1.47   | 63240  | 2.98    | 1-TETRADECANOL                              | 55.10    |
| 11    | 13.572 | 137884  | 1.82   | 71649  | 3.38    | CARYOPHYLLENE, EPOXIDE                      | 79.05    |
| 12    | 14.689 | 27038   | 0.36   | 12396  | 0.58    | 1-(2-HYDROXYETHOXY)TRIDECANE                | 57.10    |
| 13    | 14.748 | 52813   | 0.70   | 32199  | 1.52    | OCTADECANE                                  | 57.05    |
| 14    | 15.851 | 55669   | 0.74   | 30418  | 1.44    | 1-HEPTADECENE                               | 55.05    |
| 15    | 16.427 | 36520   | 0.48   | 22494  | 1.06    | OCTADECANAL                                 | 57.10    |
| 16    | 19.235 | 49032   | 0.65   | 14383  | 0.68    | METHYL PRISTANATE                           | 57.05    |
| 17    | 31.877 | 177622  | 2.35   | 74018  | 3.49    | 1,2-Dihydropyridine, 1-(1-oxobutyl)-        | 93.10    |
| 18    | 33.031 | 45694   | 0.60   | 16494  | 0.78    | OCTADECYL FLUORIDE                          | 57.10    |
| 19    | 34.668 | 645325  | 8.53   | 251691 | 11.88   | Squalene                                    | 69.05    |
| 20    | 39.632 | 63808   | 0.84   | 16020  | 0.76    | dl-.alpha.-Tocopherol                       | 165.05   |
| 21    | 42.286 | 32047   | 0.42   | 8612   | 0.41    | 2-TETRADECYNAL, 4-HYDROXY-                  | 67.05    |
| 22    | 43.891 | 149255  | 1.97   | 25134  | 1.19    | 1-BROMO-8-METHYLHEXACOSANE                  | 57.05    |
|       |        |         | 100.00 |        | 100.00  |                                             |          |

**Table S4. Guava leaf extract**

| Peak# | R.Time | Area     | Area% | Height  | Height% | Name                                 | Base m/z |
|-------|--------|----------|-------|---------|---------|--------------------------------------|----------|
| 1     | 10.877 | 3024253  | 9.23  | 1184407 | 8.65    | Copaene                              | 105.10   |
| 2     | 11.287 | 175450   | 0.54  | 63580   | 0.46    | BETA.-CARYOPHYLLENE                  | 93.05    |
| 3     | 11.497 | 11428272 | 34.89 | 4752844 | 34.73   | Caryophyllene                        | 93.10    |
| 4     | 11.719 | 985300   | 3.01  | 405665  | 2.96    | 1,2-Dihydro-2,2,4-trimethylquinoline | 158.10   |
| 5     | 11.869 | 655197   | 2.00  | 210622  | 1.54    | .alpha.-Cubebene                     | 161.15   |
| 6     | 11.959 | 952524   | 2.91  | 481981  | 3.52    | ALPHA-CARYOPHYLLENE                  | 93.10    |
| 7     | 12.165 | 461992   | 1.41  | 213755  | 1.56    | ALPHA.-AMORPHENE                     | 161.15   |
| 8     | 12.425 | 1363810  | 4.16  | 735265  | 5.37    | cis-.alpha.-Bisabolene               | 93.10    |
| 9     | 12.467 | 396853   | 1.21  | 233238  | 1.70    | 2,4-DITERT-BUTYLPHENOL               | 191.10   |
| 10    | 12.533 | 1402503  | 4.28  | 759311  | 5.55    | .beta.-Bisabolene                    | 69.10    |
| 11    | 12.755 | 347499   | 1.06  | 158555  | 1.16    | trans-calamenene                     | 159.10   |
| 12    | 12.894 | 867529   | 2.65  | 392124  | 2.87    | CADINA-1,4-DIENE                     | 119.10   |
| 13    | 13.144 | 1508107  | 4.60  | 829324  | 6.06    | Nerolidyl acetate                    | 69.05    |
| 14    | 13.558 | 1103099  | 3.37  | 616347  | 4.50    | BETA.-CARYOPHYLLENE OXIDE            | 79.10    |
| 15    | 13.825 | 344417   | 1.05  | 96815   | 0.71    | Globulol                             | 107.05   |
| 16    | 14.193 | 681419   | 2.08  | 347775  | 2.54    | Longipinocarveol, trans-             | 136.15   |
| 17    | 14.258 | 640714   | 1.96  | 264260  | 1.93    | DELTA.-CADINOL                       | 161.15   |
| 18    | 14.392 | 375018   | 1.14  | 106456  | 0.78    | AROMADENDRENE                        | 109.10   |
| 19    | 14.733 | 350229   | 1.07  | 119122  | 0.87    | Eicosane                             | 57.10    |
| 20    | 16.406 | 1067589  | 3.26  | 554483  | 4.05    | NEOPHYTADIENE                        | 68.10    |
| 21    | 24.152 | 891521   | 2.72  | 212892  | 1.56    | 1-Acetoxyonadecane                   | 83.10    |

|    |        |         |        |        |      |                                               |        |
|----|--------|---------|--------|--------|------|-----------------------------------------------|--------|
| 22 | 32.142 | 819899  | 2.50   | 287436 | 2.10 | 4,4'-((p-Phenylene)diisopropylidene)di phenol | 331.20 |
| 23 | 34.629 | 749865  | 2.29   | 285373 | 2.09 | Squalene                                      | 69.05  |
| 24 | 43.817 | 2163906 | 6.61   | 373665 | 2.73 | .beta.-Sitosterol                             | 81.10  |
|    | 100.00 |         | 100.00 |        |      |                                               |        |
